## CORTICAL ENTROPY VALUES CORRELATE WITH BRAIN SCALE-FREE DYNAMICS

Arturo Tozzi<sup>1</sup> (corresponding Author), James F. Peters<sup>2</sup>, Mehmet Niyazi Çankaya<sup>3</sup>

<sup>1</sup>Computational Intelligence Laboratory, University of Manitoba, Winnipeg, Canada  
Winnipeg R3T 5V6 Manitoba  
E-mail address: tozziarturo@libero.it

<sup>2</sup>Department of Electrical and Computer Engineering, University of Manitoba  
75A Chancellor's Circle  
Winnipeg, MB R3T 5V6 Canada and  
Department of Mathematics, Faculty of Arts and Sciences, Adıyaman University  
02040 Adıyaman, Turkey  
James.Peters3@umanitoba.ca

<sup>3</sup>Department of Statistics, Faculty of Arts and Science, Usak University  
Usak, Turkey  
mehmet.cankaya@usak.edu.tr, mehmetn\_cankaya@yahoo.com

### Keywords:

Rényi entropy, power laws, nervous system, scale-free, shadows, central nervous system

### ABSTRACT

A two-dimensional shadow may encompass more information than its corresponding three-dimensional object. If we rotate the object, we achieve a pool of observed shadows from different angulations, gradients, shapes and variable length contours that make it possible for us to increase our available information. Starting from this simple observation, we show how informational entropies might turn out to be useful in the evaluation of scale-free dynamics in the brain. Indeed, brain activity exhibits a scale-free distribution, which appears as a straight line when plotted in a log power versus log frequency plot. A variation in the scale-free exponent and in the line scaling slope may occur during different functional neurophysiological states. Here we show that modifications in scaling slope are associated with variations in Rényi entropy, a generalization of Shannon informational entropy. From a three-dimensional object's perspective, by changing its orientation (standing for the cortical scale-free exponent), we detect different two-dimensional shadows from different perception angles (standing for Rényi entropy in different brain areas). We perform simulations showing how, starting from known values of Rényi entropy (easily detectable in brain fMRIs or EEG traces), it is feasible to calculate the scaling slope in a given moment and a given brain area. Because changes in scale-free cortical dynamics modify brain activity, suggests the possibility of novel insights in mind reading and description of the forces required for transcranial stimulation.

### INTRODUCTION

Counter-intuitively, a 3D object might encompass less information than a 2D object (we do not see the hidden side of the moon). When observed from a given standpoint, an opaque 3D object could be less informative than a series of its 2D shadows (**Figure 1A**). Here we ask: is there a way to increase the information content of the shadow, to make it possible detect more details about the object, let us say a toy? The answer is positive, if we rotate the toy clockwise (or anticlockwise) along its central axis (**Figures 1B, 1C**). In this case, we achieve a pool of different shadows and shape contours with different angulations, able to increase our total available information. Therefore, 3D object shadows (taken in its totality) are more informative, for a watching observer, whenever he moves. Or, in other words, one could extract

more information from a dynamical system, than from a static one. This “toy” analogy gives us the possibility to assess brain function in a novel way. For the purpose of this paper, the toy at rest stands for a given brain scale-free exponent, and its shadows for the corresponding Shannon entropy. In turn, the changes in location of the moving toy stand for changes in brain power law exponents, while the modifications in shadow’s shape and its undulating contour stand for the corresponding Rènyi entropy (Rènyi 1961; Rènyi 1966; Peters 2017; Peters-Ramanna 2016).

Using our example of a toy as a 3D object and its moving shadows, the aim of this paper is to extract information about such 3D toy, by looking at its moving shadows: in neurophysiological terms, we want to assess the relationships among power-law exponents and generalized informational entropies. Furthermore, we would consider the recent advancement in the neurophenomenology research that established a link between a nested operational architectonics hierarchy of brain functioning (indexed by the EEG field) and the phenomenal (mental) level of brain organization (Fingelkurts and Fingelkurts, 2001; Fingelkurts et al., 2009, 2010, 2013a). According to this line of research, the meanings, which subjectively (mentally) are experienced as thoughts or perceptions, can best be described objectively as created and carried by dynamic fields of neural activity of different sizes that are nested within the operational architectonics hierarchy that organize hundreds of millions of neurons and trillions of synapses (Fingelkurts and Fingelkurts, 2001; Fingelkurts et al., 2009, 2010, 2013a). Starting from Shannon and Rènyi entropies, and introducing a link with the scale-free cortical behavior, we show how the brain could be able to change its scaling slopes, in order to control different mental states. We perform simulations in order to demonstrate how, starting from the Rènyi entropy easily detectable in neurodata series (e.g., from brain fMRI or EEG), it is feasible to calculate the cortical scale-free exponent in a given moment, and, consequently, the corresponding mental state.

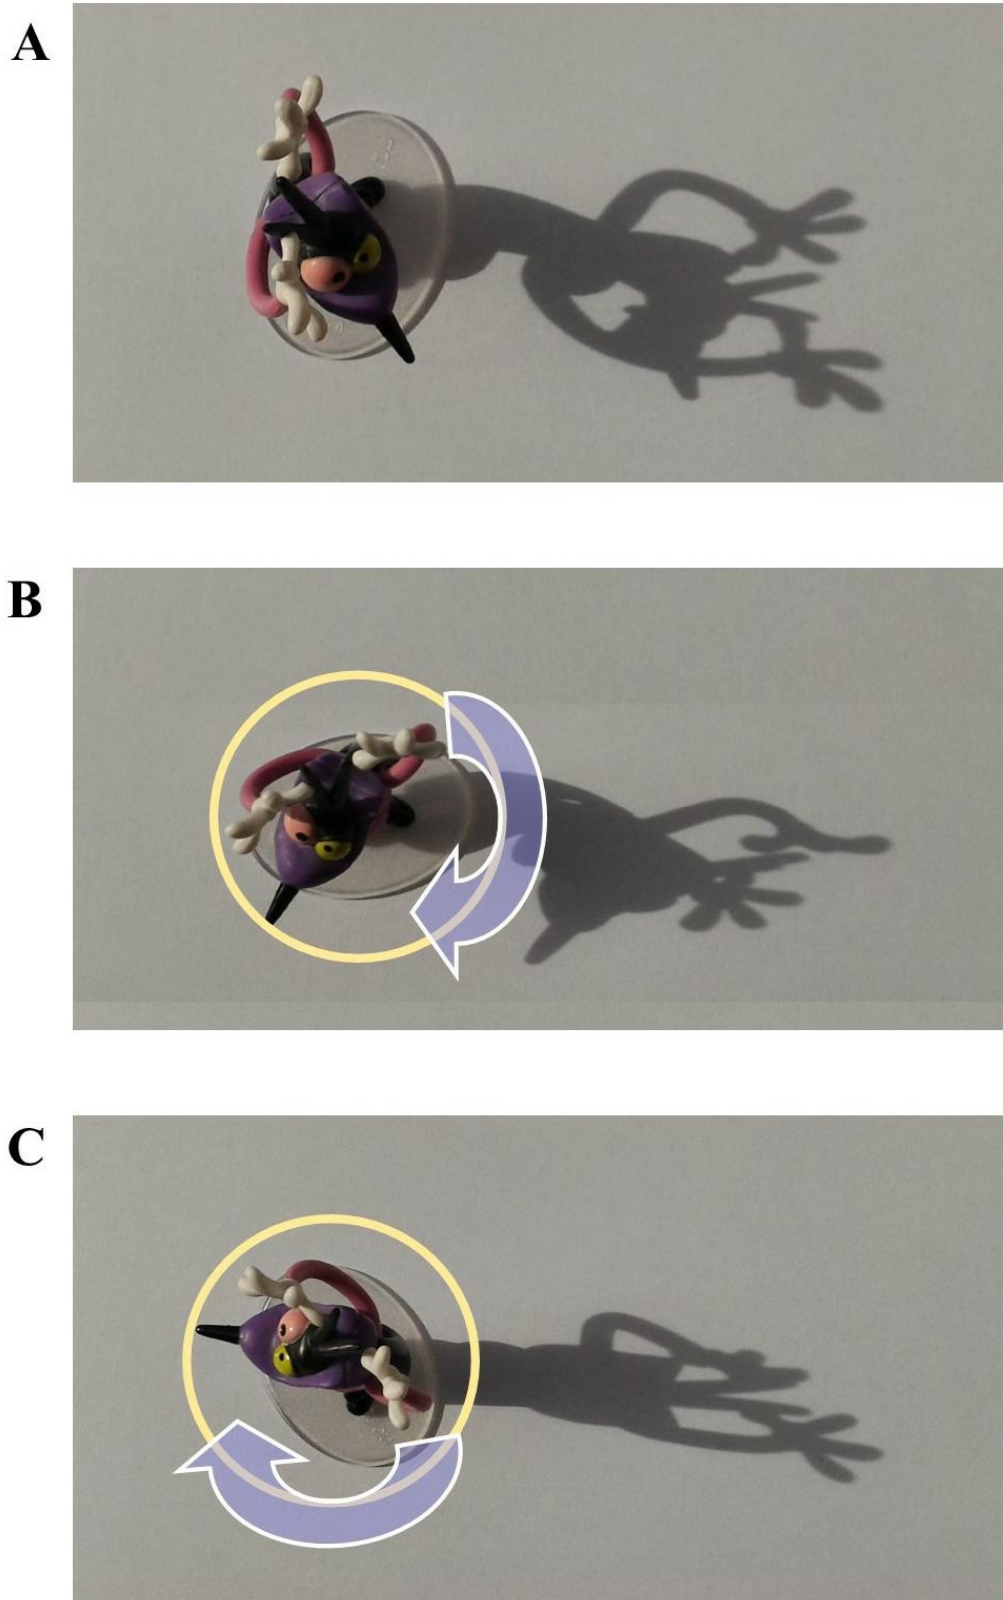

**Figure 1.** A toy under a light source. In **Figure 1A**, the 2D shadow offers more details of the 3D object than the view on the toy from above. **Figures 1B** and **1C** show how toy rotations lead to shadows with different shapes, and, consequently,

with different information content. Therefore, a complete 360 degrees rotation of the object allows a complete evaluation of the shadows' shapes.

## MATERIALS AND METHODS

**Shannon entropy on a toy.** The brain activity, e.g., in our analogy toy and its movements, can be described in terms of scale-free dynamics. The brain activity observed at many spatiotemporal scales exhibits fluctuations with complex scaling behavior (Newman, 2005; Fingelkurts et al., 2010, 2013a), including not just cortical electric oscillations, but also membrane potentials and neurotransmitter release (Linkenkaer-Hansen et al., 2001; Fox and Raichle, 2007; Milstein et al., 2009). In particular, the frequency spectrum of the cerebral electric activity displays a scale-invariant behaviour, characterized by a given power spectrum, a given frequency and a given exponent, that equals the negative slope of the line in a log power versus log frequency plot (Pritchard, 1992; Van de Ville et al., 2010). In simple terms, a fractal slope  $1=$  stands for a horizontal line parallel to the x axis: the steeper the line, the higher the power law. The (spatial) fractals and (temporal) power laws can be regarded as intrinsic properties of the brain and characterize a large class of neuronal processes (de Arcangelis and Herrmann, 2010; He et al., 2010); moreover, pink noise distributions contain information about how large-scale physiological and pathological outcomes arise from the interactions of many small-scale processes (Jirsa et al., 2014).

Keeping this in mind, a given slope in a given moment of brain activity stands, in our example, for the toy at rest. Toy features can be described through their shadow, e.g., the Shannon entropy. The classical informational Shannon entropy is (Shannon 1948):

$$H(X) = - \sum_{x \in X} \Pr(x) \log_2 [\Pr(x)].$$

The term  $X$  is a random variable with  $n$  possible outcomes, while  $p_i = \Pr(x)$ , for  $i = 1, 2, 3, \dots, n$ , is a probability distribution  $Pr$  on a finite set. Shannon entropy states that, under ergodic conditions, if we know the values of  $\Pr(x)$ , we may obtain the values of  $H(X)$ . In other words,  $H(X)$  is a probability density function that defines a generic probability distribution  $Pr$  such that, if we modify  $Pr$ , we obtain a different value of entropy on the Shannon's curve. Hence, changing the probabilities usually occurs when we have prior information. In terms of the object depicted in **Figure 1A**, the steady toy stands for the systems' microstates, undetectable by macroscopic observers, while the shadow stands for the lower-dimensional Shannon entropy. Looking at the shadow (the Shannon entropy), we achieve otherwise undetectable information about opaque 3D objects such as the toy features.

Now we need to find a brain functional counterpart for the moving toy and its changing shape and varying contours of shadows. Indeed, the scale-free slopes are not constant in the brain dynamics, rather they are characterized by multiple possible exponents during various functional states. It has been demonstrated that different functional states - spontaneous fluctuations, task-evoked, perceptual and motor activity (Buszaki and Watson, 2012), cognitive demands (Buiatti et al., 2007; Fetterhoff et al., 2014), ageing (Suckling et al., 2008) - account for variations in power law exponents across cortical regions (Tinker and Velazquez, 2014; Wink et al., 2008). Accordingly, we may view brain activity as an ensemble of intertwined (mono)fractals, each with its own power slope and scaling range, each marking dynamical transitions between different response regimes (Papo, 2014; see also review Fingelkurts et al., 2013a). In terms of our toy, the whole brain activity stands for all the possible 360 degrees of rotation and their corresponding shadows.

**Introducing Rényi entropy.** The 360 degrees changes in toy angulation that gives rise to different shadows can be described in terms of Shannon entropy generalizations. Among the available ones (e.g., Tsallis, 1988), here we favour the one-parameter class of Rényi entropies (Rényi, 1966), a flexible and underestimated information-theory based index (Cambell, 1965). Rényi entropy (1961,1966) is characterized by a changing parameter  $\alpha$  and can be defined as:

$$H_\alpha(X) = \frac{1}{1-\alpha} \sum_{\substack{i=1, \\ x \in X}}^N p_i^\alpha(x),$$

where  $0 \leq \alpha < \infty$  and  $p_i^\alpha(x)$  is the probability of event  $x$ . The Rényi entropy approaches the Shannon entropy as  $\alpha$

approaches 1. In other words, the Shannon entropy is a case of Rényi entropy in which  $\alpha=1$ . Rényi entropy has applications in dynamical systems (Hentschel and Proccacia, 1983), coding (Cambell, 1965), information transfer (Jizba et al., 2012), theories in quantum mechanics (Jizba et al., 2015), black holes' mutual information (Dong, 2016), assessment of human heartbeat fluctuations and coding/noncoding DNA sequences analysis (Costa et al., 2005). Rényi entropy has also been used to quantify ecosystems dynamics and diversity: from land cover types (Carranza et al., 2007; De Luca et al., 2011), to coastal dunes environments (Drius et al., 2013), from urban mosaics (Carranza et al., 2007) to species diversity in large areas (Rocchini et al., 2013).

Unlike Shannon entropy, Rényi entropy makes it possible to describe the system's status not just at a specific moment, but also when its trend *varies with time* (Müller et al., 2000; Patil and Taillie, 2001). Diversity cannot be reduced to a single index information, since all its aspects cannot be captured in a single statistic (Gorelick, 2006). A complete characterization of landscape diversity can be achieved if, instead of a single index, a parametric family of indices is used, whose members have varying sensitivities to the presence of rare and abundant elements (Jost, 2007). Diversity profiles are flat when the landscape is even, and steeply decrease as the landscape turns uneven (Jost, 2010). Therefore, Rényi's formulation allows a continuum of possible diversity measures which differ in their sensitivity to the rare and abundant elements in a landscape. Because of its build-in pre-disposition to account for self-similar systems, Rényi entropy is an effective tool to describe multifractal systems (Jizba and Arimitsu, 2001). This means that the generalized fractal dimensional and the Rényi exponent can be thought of as interchangeable. In technical terms, the Rényi parameter is connected via a Legendre transformation with the multifractal singularity spectrum. See Jizba and Arimitsu (2001) and Jizba and Korbel (2014) for technical details on mathematical proof. In particular, this means that Rényi entropy and scale-free exponent (and therefore the scaling slope) are strictly correlated. Therefore, changes in scaling slope lead to changes in the Rényi parameter, and vice versa (Słomczynski et al., 2000): scale-free systems lead to different probability outcomes (in our case, mental functions), based solely on increases or decreases of scale-free exponents. In sum, the "probabilistic" virtues of Rényi entropy represent a novel physics-based approach to probe brain scale-free dynamics, with the potential to lead to new insights into brain systems at all space-time scales and all levels of complexity.

The crucial question, is: What for? How might such a scheme help, in the experimental assessment of brain dynamics? Can the variations (fluctuations) in Rényi entropy can be correlated with the values of a circle perimeter (standing for 360 degrees angles of our toy example rotations)? Our moving toy might help to elucidate such concept. Indeed, toy rotations form an angle on a 360 degrees circumference, so that every angle corresponds to a different shadow, i.e., to a different value of Rényi entropy (**Figures 1B** and **1C**). In neurophysiological terms, we are allowed to calculate a full spectrum of Rényi entropies, just by evaluating the changes in fractal slopes. The procedure will be described in the next paragraph.

## RESULTS

Here we show the procedure in order to correlate our formulation of Rényi entropy with brain scale-free dynamics. We performed simulations of randomly generated angles on a 2D circle. Every angle displays a random degree, so that their total sum stands for a 360 degrees full circle. The number of rays originating from the circle's center can be modelled through the cosine theorem, which states that:

$$per_i^2 = b_i^2 + c_i^2 - 2b_i c_i \cos(\theta), i = 1, 2, \dots, n,$$

where  $b$  and  $c$  (which could be randomly generated in simulations) are the length of rays originating from the circle's central point. The parameter  $per$  is one of the three sides of the triangle lying on the circle perimeter (**Figure 2, left side**).

The randomly generated parameter  $\theta$  stands for the angle between two rays, while  $n$  stands for the number of rays. The sum of  $per_i$ , namely  $\sum_{i=1}^n per_i$ , can be regarded as the circle's perimeter. Each set of perimeter values produces just one Rényi entropy value: therefore, we replicated the simulation one hundred times.

Note that, in our simulation, the fluctuations in Rényi entropy values depend just on the different perimeter values. In terms of brain assessment, we, instead of evaluating random number, assess the cortical scale-free activity and the scaling slopes. In such a vein, two cerebral hemispheres can be unfolded and flattened into a two-dimensional reconstruction by computerized procedures (Van Essen, 2005). In this model, the nervous electric activity occurs on a 2D brain surface with an approximated circular shape (**Figure 2, left side**). Perimeter values allow us to detect the nervous activity's travel lengths on the brain surface. After the brain signal's travel length has been achieved, the corresponding Rényi Entropy values can be computed ("EntropyEstimation" package: <https://cran.r-project.org/web/packages/EntropyEstimation/EntropyEstimation.pdf>). **Figure 2, right side**, displays simulated Rényi

values obtained from the perimeter values computed through the cosine theorem. In toy's terms, this means that a larger rotation gives rise to higher levels of information detected from the shadows, while, in brain's terms, the higher the variations in scaling slopes, the higher the detected Rényi entropy. And vice versa.

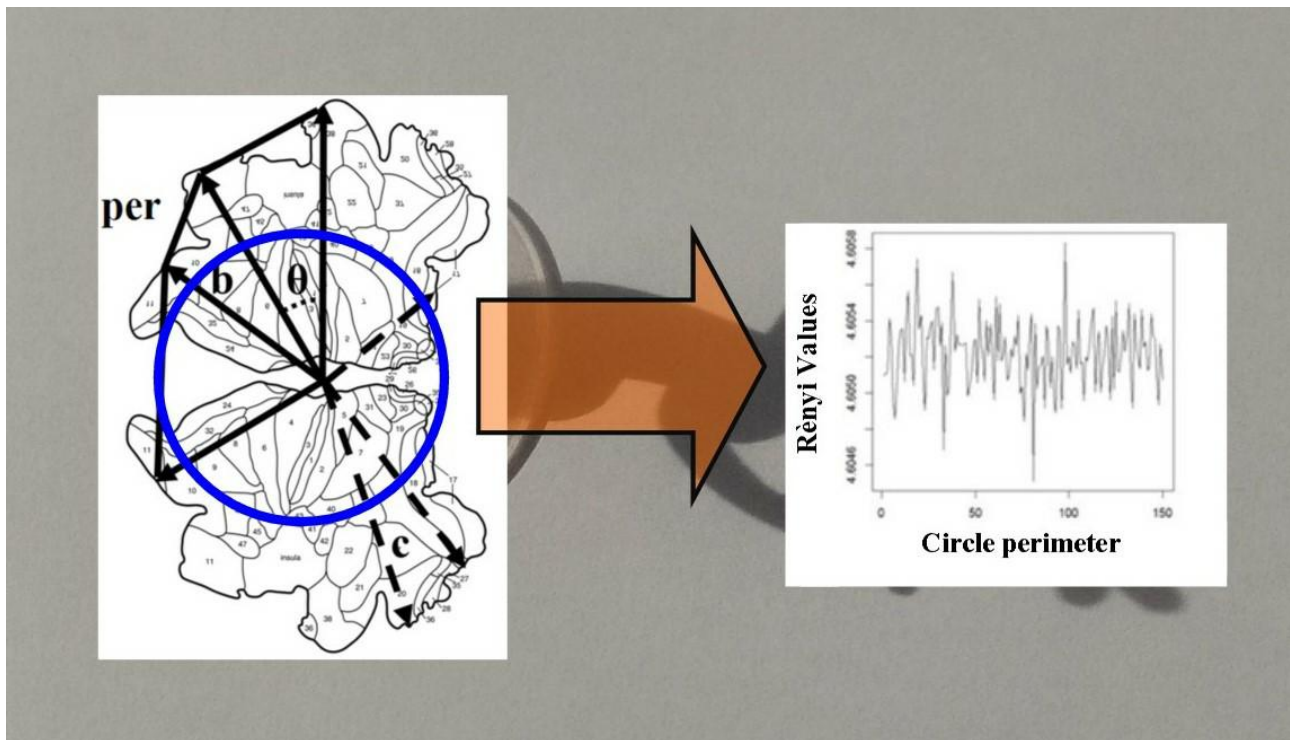

**Figure 2.** Rényi entropy' circle perimeter and its values (computed by the `Rényi.z` function in version 3.2.3 of R software) are superimposed, respectively, to the moving toy and its shadow. **Left part:** Cosine theorem for the evaluation of travel length Rényi entropies in a model of two-dimensional brain (modified from Van Essen, 2005). **Right part:** Simulated Rényi values for each circle's perimeter values for  $n=60$  and a Rényi exponent=4;  $\theta$  is generated from a uniform distribution in  $(0,1)$  and multiplied by 360. The Rényi entropy values' bandwidth is around 4.6.

## CONCLUSIONS

We described how primitive changes in a single cortical parameter (the scaling slope) may lead to different probability distributions in the brain. We showed that a clear correlation does exist between multifractal spectrum and brain spikes evaluated in terms of probability states. Our novel "inverse", top-down entropic approach (enabling from known entropy changes, to achieve the unknown probability distributions) allows us to evaluate the macro-states of the nervous system based on a sole order parameter, although we lack a perfect knowledge of micro-states. In our simulations, random numbers generated from different distributions are able to modify the values of Rényi entropy: this means that the brain scale-free spectrum can be extrapolated, just starting from the values of entropy experimentally detected in EEG or fMRI traces. Considering the connection between brain activity dynamics and the mental states (Fingelkurts and Fingelkurts, 2001; Fingelkurts et al., 2009, 2010, 2013a), this observation paves the way to tackle the difficult issue of mind reading.

We hypothesize that, in order to optimize its functions, the brain could be equipped with intrinsic mechanisms of scaling features: in this framework, changes in scale-free exponents play a crucial role in information processing, leading to variations in entropy and probability of mental states. Empirical evidence suggests that cognitive tasks are modulated by the scale-free exponents of the brain fluctuation probability function, leading to a shrinking of multifractal spectrum and/or transitions from mono- to multi-fractal distributions (Popivanov et al., 2006; Fraiman and Chialvo, 2012).

Our results pave the way for innovative diagnostic and therapeutic strategies. For example, the widely-diffused method of pairwise entropy in neuroimaging techniques (Watanabe et al., 2014) might benefit of a reverse Rényi entropy-based

approach. It is indeed feasible to start from known functional changes in thermodynamic parameters and/or multifractal slopes, in order to achieve the unknown parameters of probability distribution (the spike frequency). In particular, a change in Rényi exponent, caused by variations in scaling slopes, might lead to different probability outcomes, which can be calculated if just their pairwise entropies are known. Rényi entropy offers a “continuum of possible diversity measures” (Ricotta et al., 2003) at diverse spatiotemporal scales, becoming increasingly regulated by the commonest when  $\alpha$  gets higher. The change in  $\alpha$  exponent can be regarded as a scaling operation that takes place not in the real, but in the data space (Podani, 1992). We are thus allowed to evaluate how changes of Rényi parameter influence the structure of information measures in the probability space of the scale-free dynamics.

We also conjecture that the scale-free-like brain electric activity - setting aside their supposed relationships with self-organized criticality (Bak et al., 1987), nonequilibrium steady-state dynamics or second order phase transitions (Papo, 2014) - could be modulated through the superimposition of an external electric currents characterized by carefully chosen power law exponents. This may have a practical application. For example, our results suggest that transcranial electrical stimulation’s techniques need to take into account not only the amplitude and frequency of the applied waveforms (Reato et al., 2013), but also their scaling slope. A further tenable field of application are the diseases that have been linked to disturbance of brain networks - Alzheimer’s disease, depression, attention deficit hyperactivity disorder, schizophrenia, autism (Fox and Raichle, 2007; Fingelkurts and Fingelkurts, 2010) -, meaning that they could be ameliorated, or even treated, by appropriate exogenous electromagnetic fields - e.g., via selective application of electric/magnetic waves of specific scale-free exponent on target micro-areas - able to “recover” and restore the physiological brain functions (Sunderam et al., 2009; Fingelkurts and Fingelkurts, 2010, 2015) and related subjective experiences (Fingelkurts et al., 2013b).

## BIBLIOGRAPHY

- 1) Attwell D, Laughlin SB. 2001. An energy budget for signaling in the grey matter of the brain. *Journal of Cerebral Blood Flow Metabolism*, 21(10), 1133-1145.
- 2) Baez JC. (2011). Entropy and Free Energy. arXiv:1102.2098 [quant-ph].
- 3) Bak, P., Tang, C., Wiesenfeld, K (1987). Self-organized criticality: An explanation of the 1/f noise. *Physical Review Letters*, 59(4), 381-384. PMID: 10035754.
- 4) Borsuk M. 1933. Dreisatzeuber die n-dimensionale euklidischesphäre, *Fundamenta Mathematicae* XX, 177–190.
- 5) Buiatti M, Papo D, Baudonnière P-M., van Vreeswijk C. 2007. Feedback modulates the temporal scale-free dynamics of brain electrical activity in a hypothesis testing task. *Neuroscience*, 146:1400-1412. doi:10.1016/j.neuroscience.2007.02.048.
- 6) Buzsáki G, Watson BO. 2012. Brain rhythms and neural syntax: implications for efficient coding of cognitive content and neuropsychiatric disease. *Dialogues in Clinical Neurosciences*, 4, 345-367.
- 7) Cambell LL. 1965. A coding theorem and Rényi entropy. *Information and Control* 8(4), 423-429.
- 8) Çankaya MN, Bulut YM, Dođru FZ, Arslan O. 2015. A Bimodal Extension of the Generalized Gamma Distribution, *Revista Colombiana de Estadística*, Vol. 38, 371-378.
- 9) Carranza ML, Acosta A, Ricotta C. 2007. Analyzing landscape diversity in time: the use of Rényi’s generalized entropy function. *Ecological Indicators*, 7, 505e510.
- 10) Costa M, Goldberger AL, Peng CK. 2005. Multiscale entropy analysis of biological signals. *Phys Rev E Stat Nonlin Soft Matter Phys.* 71(2 Pt 1):021906. Epub 2005 Feb 18.
- 11) de Arcangelis L, Herrmann HJ. 2010. Learning as a phenomenon occurring in a critical state. *Proceedings of the National Academy of Sciences*, 107, 3977-3981.
- 12) De Luca E, Novelli C, Barbato F, Menegoni P, Iannetta M, Nascetti G. 2011. Coastal dune systems and disturbance factors: monitoring and analysis in central Italy. *Environmental Monitoring and Assessment*, 183, 437e450.
- 13) Dong X. 2016. The gravity dual of Rényi entropy. *Nature Communications* 7, 12472. doi:10.1038/ncomms12472.
- 14) Drius M, Malavasi M, Rosario Acosta AT, Ricotta C, Carranza ML. 2013. Boundary-based analysis for the assessment of coastal dune landscape integrity over time. *Applied Geography* 45, 41–48.

- 15) Fetterhoff D, Opris I, Simpson SL, Deadwyler SA, Hampson RE, Kraft RA. 2014. Multifractal analysis of information processing in hippocampal neural ensembles during working memory under  $\Delta 9$ -tetrahydrocannabinol administration. *Journal of Neuroscience Methods*, pii: S0165-0270(14)00264-7. doi: 10.1016/j.jneumeth.2014.07.013.
- 16) Fingelkurts, A.A.; Fingelkurts, A.A. 2001. Operational architectonics of the human brain biopotential field: Towards solving the mind-brain problem. *Brain and Mind* 2, 261–296.
- 17) Fingelkurts, A.A.; Fingelkurts, A.A. 2010. Alpha rhythm operational architectonics in the continuum of normal and pathological brain states: Current state of research. *International Journal of Psychophysiology* 76, 93–106.
- 18) Fingelkurts, A.A.; Fingelkurts, A.A. 2015. Operational architectonics methodology for EEG analysis: Theory and results. *Neuroinformatics* 91: 1–59, DOI 10.1007/7657\_2013\_60
- 19) Fingelkurts, A.A.; Fingelkurts, A.A.; Neves, C.F.H. 2009. Phenomenological architecture of mind and operational architectonics of the brain: The unified metastable continuum. *New Math. Nat. Comput.* 5, 221–244.
- 20) Fingelkurts, A.A.; Fingelkurts, A.A.; Neves, C.F.H. 2010. Natural world physical, brain operational, and mind phenomenal space-time. *Phys. Life Rev.* 7, 195–249.
- 21) Fingelkurts, A.A.; Fingelkurts, A.A.; Neves, C.F.H. 2013a. Consciousness as a phenomenon in the operational architectonics of brain organization: Criticality and self-organization considerations. *Chaos Solitons Fract.* 55, 13–31.
- 22) Fingelkurts, A.A.; Fingelkurts, A.A.; Neves, C.F.H. 2013b. The structure of brain electromagnetic field relates to subjective experience: Exogenous magnetic field stimulation study. Presented at Neuroscience Finland 2013 Meeting: Optogenetics and brain stimulation, March 22, 2013, Helsinki, Finland.
- 23) Fox MD, Raichle ME. 2007. Spontaneous fluctuations in brain activity observed with functional magnetic resonance imaging. *Nature Review Neuroscience*, 8, 700–711.
- 24) Fraiman D, Chialvo DR. 2012. What kind of noise is brain noise: anomalous scaling behavior of the resting brain activity fluctuations. *Frontiers in Physiology*, 3:307. doi: 10.3389/fphys.2012.00307.
- 25) Friston K, Rigoli F, Ognibene D, Mathys C, Fitzgerald T, Pezzulo G. 2015. Active inference and epistemic value. *CognNeurosci* 13, 1–28.
- 26) Gorelick R. 2006. Combining richness and abundance into a single diversity index using matrix analogues of Shannon's and Simpson's indices. *Ecography* 29, 525–530.
- 27) He BJ, Zempel JM, Snyder AZ, Raichle ME. 2010. The temporal structures and functional significance of scale-free brain activity. *Neuron*, 66(3), 353–369. doi: 10.1016/j.neuron.2010.04.020.
- 28) Hentschel GHE, Proccacia I. 1983. The infinite number of generalized dimensions in fractals and strange attractors. *Physica D* 8(3), 435–444.
- 29) Jirsa VK, Stacey WC, Quilichini PP, Ivanov AI, Bernard C. 2014. On the nature of seizure dynamics. *Brain*, 137(Pt 8), 2210–2230. doi: 10.1093/brain/awu133.
- 30) Jizba P, Arimitsu T. 2001. The world according to Renyi: thermodynamics of fractal systems. *AIP Conf. Proc.* 597:341–348.
- 31) Jizba P, Kleinert H, Shefaat M. 2012. Rényi information transfer between financial time series. *Physica A*, 391(10), 2971.
- 32) Jizba P, Korbel J. 2014. Multifractal diffusion entropy analysis. *Physica A* 413, 438–458
- 33) Jost L. 2007. Partitioning diversity into independent alpha and beta components. *Ecology*, 88(10), 2427e2439.
- 34) Jost L. 2010. The relation between evenness and diversity. *Diversity*, 2, 207e232.
- 35) Linkenkaer-Hansen K, Nikouline VV, Palva JM., Ilmoniemi RJ. 2001. Long-range temporal correlations and scaling behavior in human brain oscillations. *Journal of Neuroscience*, 21(4), 1370–1377.
- 36) Milstein J, Mormann F, Fried I, Koch C. 2009. Neuronal shot noise and Brownian  $1/f^2$  behavior in the local field potential. *PLoS One*, 4(2):e4338. doi: 10.1371/journal.pone.0004338.
- 37) Müller F, Hoffmann-Kroll R, Wiggering H. 2000. Indicating ecosystem integrity e theoretical concepts and environmental requirements. *Ecological Modelling*, 130, 13e23.
- 38) Newman MEJ. 2005. Power laws, Pareto distributions and Zipf's law. *Contemporary Physics*, 46, 323–351.
- 39) Papo D. 2014. Functional significance of complex fluctuations in brain activity: from resting state to cognitive neuroscience. *Frontiers in Systems Neuroscience*, 8, 112. doi: 10.3389/fnsys.2014.00112.
- 40) Patil GP, Taillie C. 2001. A multiscale hierarchical Markov transition matrix model for generating and analyzing thematic raster maps. *Environmental and Ecological Statistics*, 8, 5e20.
- 41) Perkins TJ, Foxall E, Glass L, Edwards R. 2014. A scaling law for random walks on networks. *Nature Communications*, 5, 5121. doi: 10.1038/ncomms6121.



- 42) Peters JF. 2017. Foundations of Computer Vision. Computational Geometry, Visual Image Structures and Object Shape Recognition. Springer Int. Pub. AG, DOI 10.1007/978-3-319-52483-2.
- 43) Peters JF, Ramanna, S. 2016. Maximal nucleus clusters in Pawlak paintings. Nerves as approximating tools in visual arts. Proc. Fed. Conf. on Comp. Sci. and Info. Systems, vol. 8, 199-202, DOI: 10.15439/2016F004.
- 44) Podani J. 1992. Space series analysis: processes reconsidered. Abstracta Botanica 16, 25–29.
- 45) Popivanov, D., Stomonyakov, V., Minchev, Z., Jivkova, S., Dojnov, P., et al. 2006. Multifractality of decomposed EEG during imaginary and real visual-motor tracking. Biological Cybernetics, 94, 149–156.
- 46) Pritchard WS. 1992. The brain in fractal time: 1/f-like power spectrum scaling of the human electroencephalogram. International Journal of Neuroscience, 66, 119-129.
- 47) Reato D, Rahman A, Bikson M, Parra LC. 2013. Effects of weak transcranial alternating current stimulation on brain activity-a review of known mechanisms from animal studies. Frontiers in Human Neuroscience, 7:687.
- 48) Rényi A. 1966. On measures of entropy and information. Proc. 4<sup>th</sup> Berkeley Symposium Math. Statist. and Probability I, 1961, 547-561, MR0132570.
- 49) Rényi A. 1966. Calcul des probabilités [French], Éditions Jacques Gabay, Sceaux, 1966,1992Ed., vii+311 pp., ISBN: 2-87647-082-9; MR1296880.
- 50) Ricotta C, Avena G. 2003. On the relationship between Pielou's evenness and landscape dominance within the context of Hill's diversity profiles. Ecological Indicators 2, 361–365.
- 51) Rocchini D, Delucchi L, Bacaro G, Cavallini P, Feilhauer H, et al. 2013. Calculating landscape diversity with information-theory based indices: A GRASS GIS solution. Ecological Informatics 17, 82–9.
- 52) Sengupta B, Stemmler MB, Friston KJ. 2013. Information and efficiency in the nervous system - a synthesis. PLoS Computational Biology, 9(7):e1003157. doi: 10.1371/journal.pcbi.1003157.
- 53) Shannon CE. 1948. A Mathematical Theory of information. The Bell System Technical Journal, 27, 379-423, 623-656.
- 54) Słomczynski W, Kwapien J, Zyczkowski K. 2000. Entropy computing via integration over fractal measures. Chaos, 10(1), 180-188.
- 55) Suckling J, Wink AM, Bernard FA, Barnes A, Bullmore E. 2008. Endogenous multifractal brain dynamics are modulated by age, cholinergic blockade and cognitive performance. Journal of Neuroscience Methods, 174(2), 292-300. doi:10.1016/j.jneumeth.2008.06.037.
- 56) Sunderam S, Chernyy N, Peixoto N, Mason JP, Weinstein SL, et al. 2009. Seizure entrainment with polarizing low-frequency electric fields in a chronic animal epilepsy model. Journal of Neural Engineering, 6(4):046009. doi: 10.1088/1741-2560/6/4/046009.
- 57) Tinker J, Velazquez JL. 2014. Power law scaling in synchronization of brain signals depends on cognitive load. Frontiers in Systems Neuroscience, 8:73. doi: 10.3389/fnsys.2014.00073.
- 58) Tozzi A, Zare M, Benasich AA. 2016. New Perspectives on Spontaneous Brain Activity: Dynamic Networks and Energy Matter. Frontiers in Human Neuroscience. doi:10.3389/fnhum.2016.00247.
- 59) Tsallis C. 1988. Possible generalization of Boltzman-Gibbs Statistics. Journal of Statistical Physics 52(1-2), 479-487.
- 60) Van de Ville D, Britz J, Michel CM. 2010. EEG microstate sequences in healthy humans at rest reveal scale-free dynamics. PNAS.; 107(42):18179-18184. doi: 10.1073/pnas.1007841107.
- 61) Watanabe T, Masuda N, Megumi F, Kanai R, Rees G. 2014. Energy landscape and dynamics of brain activity during human bistable perception. Nat. Commun. 28, 5:4765. doi: 10.1038/ncomms5765.
- 62) Wink AM, Bullmore E, Barnes A, Bernard F, Suckling J. 2008. Monofractal and multifractal dynamics of low frequency endogenous brain oscillations in functional MRI. Human Brain Mapping, 29(7), 791-801. doi: 10.1002/hbm.20593.
